# Supplementary material for: Observation of long-range tertiary interactions during ligand binding by the TPP riboswitch aptamer
Source: eLife journal article supplement (doi:10.7554/elife.12362), 2015-12-28
Supplement: supp [file elife-12362-supp-v1.zip]

A

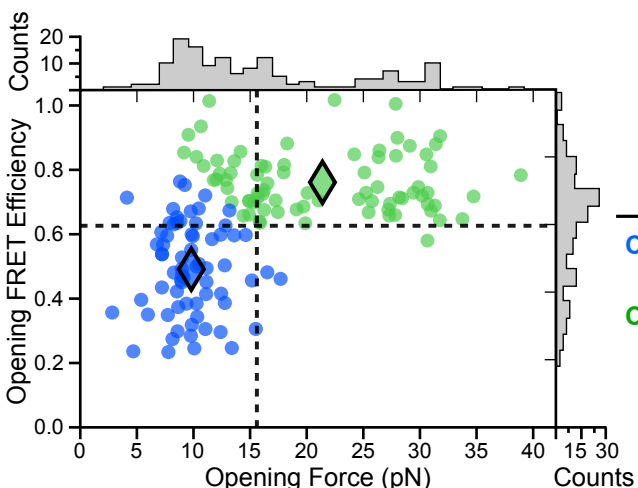

|           | Opening FRET ( $\mu \pm \text{SEM}$ ) | FRET Threshold | Opening Force (pN) ( $\mu \pm \text{SEM}$ ) | Force Threshold (pN) | n  |
|-----------|---------------------------------------|----------------|---------------------------------------------|----------------------|----|
| <b>C1</b> | $0.41 \pm 0.01$                       | 0.59           | $9.77 \pm 0.88$                             | 11.5                 | 67 |
| <b>C2</b> | $0.76 \pm 0.02$                       |                | $13.2 \pm 0.29$                             |                      | 78 |

B

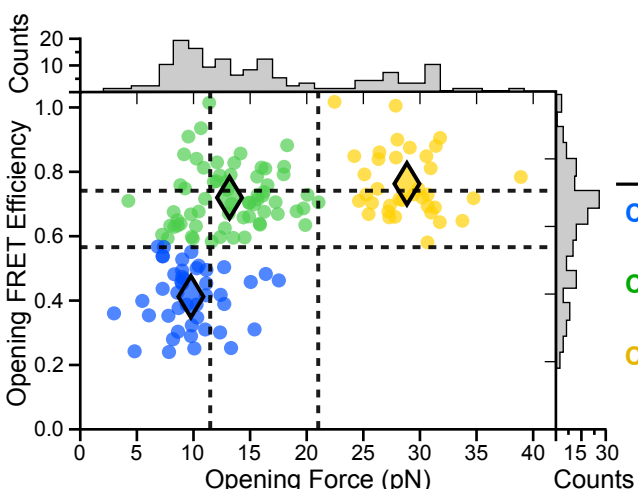

|           | Opening FRET ( $\mu \pm \text{SEM}$ ) | FRET Threshold | Opening Force (pN) ( $\mu \pm \text{SEM}$ ) | Force Threshold (pN) | n  |
|-----------|---------------------------------------|----------------|---------------------------------------------|----------------------|----|
| <b>C1</b> | $0.41 \pm 0.01$                       | 0.57           | $9.77 \pm 0.44$                             | 11.5                 | 44 |
| <b>C2</b> | $0.72 \pm 0.01$                       |                | $13.2 \pm 0.41$                             |                      | 65 |
| <b>C3</b> | $0.76 \pm 0.02$                       | 0.74           | $28.8 \pm 0.54$                             | 21.0                 | 36 |

C

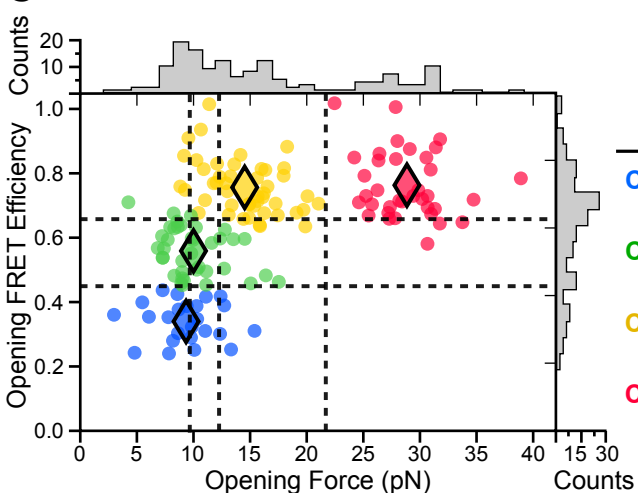

|           | Opening FRET ( $\mu \pm \text{SEM}$ ) | FRET Threshold | Opening Force (pN) ( $\mu \pm \text{SEM}$ ) | Force Threshold (pN) | n  |
|-----------|---------------------------------------|----------------|---------------------------------------------|----------------------|----|
| <b>C1</b> | $0.41 \pm 0.01$                       | 0.49           | $9.77 \pm 0.44$                             | 11.5                 | 24 |
| <b>C2</b> | $0.57 \pm 0.01$                       |                | $13.2 \pm 0.57$                             |                      | 38 |
| <b>C3</b> | $0.76 \pm 0.01$                       | 0.76           | $14.5 \pm 0.46$                             | 21.7                 | 47 |
| <b>C4</b> | $0.76 \pm 0.02$                       |                | $28.8 \pm 0.54$                             |                      | 36 |
