# Supplementary figures and images for: Observation of long-range tertiary interactions during ligand binding by the TPP riboswitch aptamer
Source: eLife journal article supplement (doi:10.7554/elife.12362), 2015-12-28

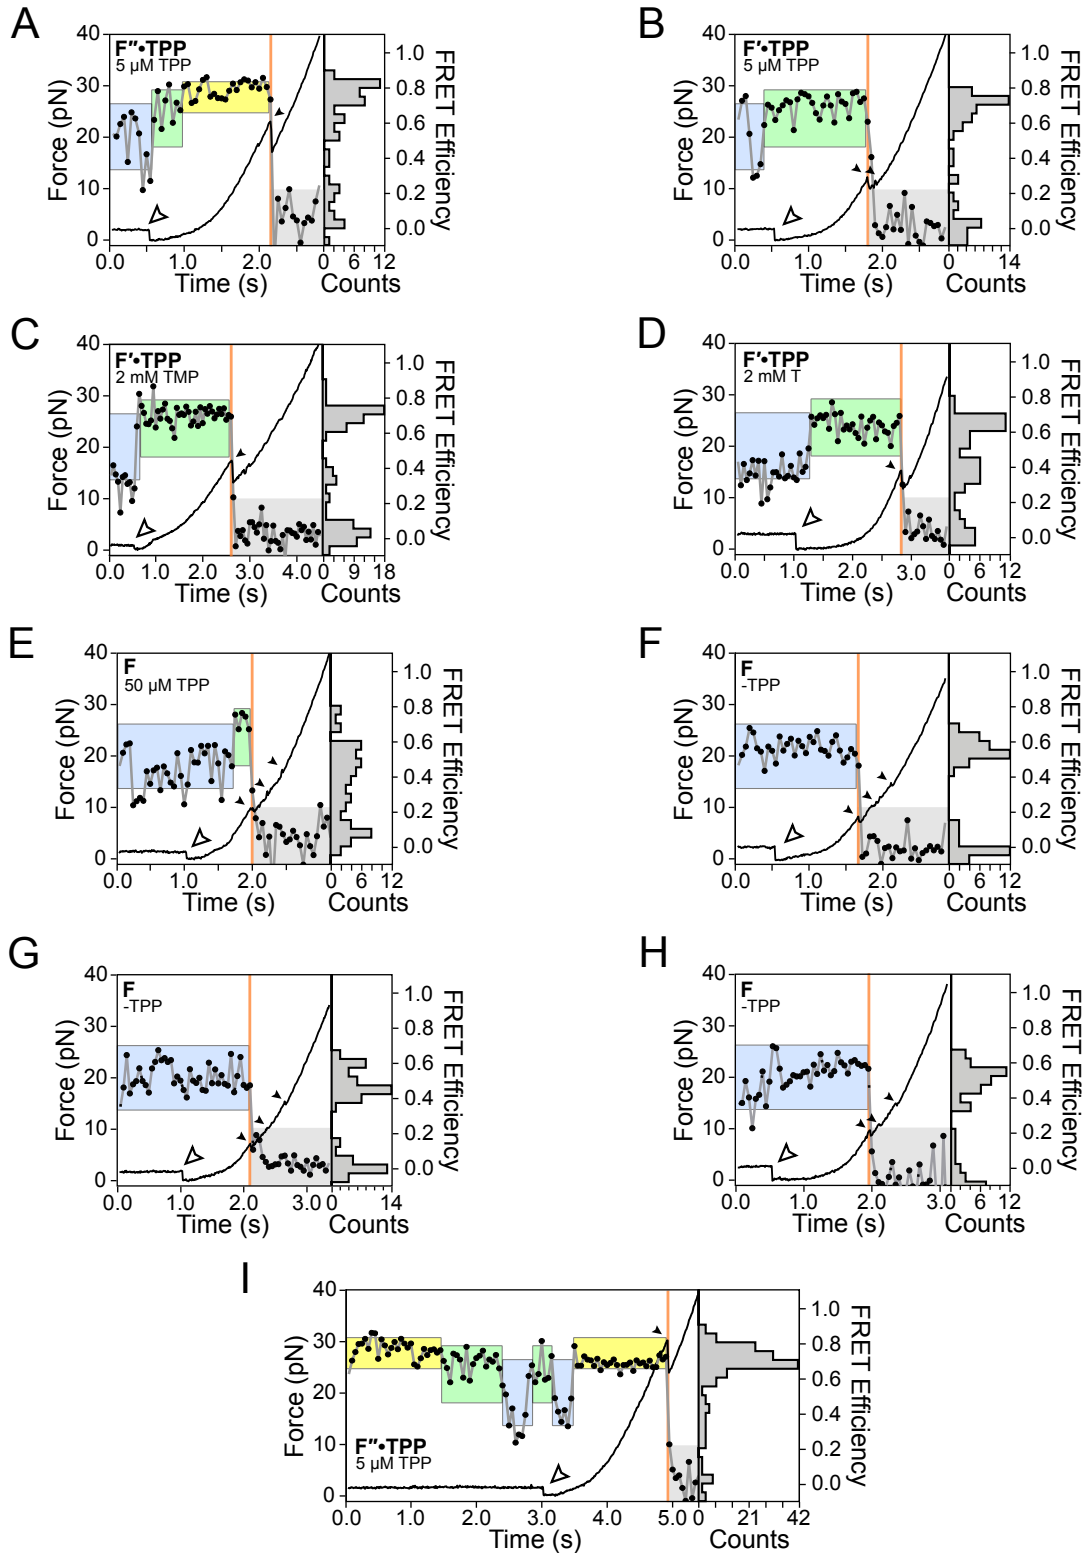

Supplement: supp [file elife-12362-supp-v1.zip]

**A**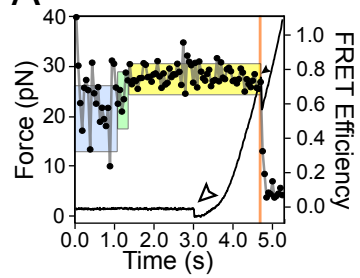**B**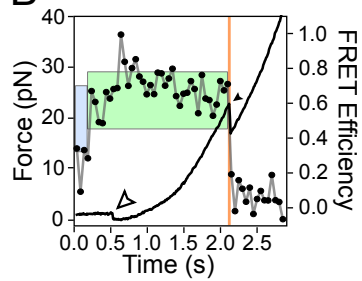

Supplement: supp [file elife-12362-supp-v1.zip]
